# Supplementary material
Source: MDPI journal article supplement (https://www.mdpi.com/2071-1050/7/1/138)
Supplement: s1 [file s1]

## Supporting Information

### 1. Appendix A—Aggregate MSUT

#### 1.1. Data Description

In the following table detailed information about data availability on systems of monetary supply and use tables is presented. The column of notes is mostly concerned with data on various valuation layers, but other important points could also be mentioned there. For a number of countries (China, Indonesia, India, Japan and South Korea) a lot of manual changes of original data were required, and, therefore, the description of the carried out transformation is given after the table.

All the original data, which was originally in national currency and/or for a year other than 2007, was scaled to the required year using GDP growth and converted into millions of Euros prior to disaggregation procedure.

**Table S1. Summary of available data used by individual country.**

| Countries      | Available raw data                                                                                                                                                                          | Notes                                                                                                                                                      |
|----------------|---------------------------------------------------------------------------------------------------------------------------------------------------------------------------------------------|------------------------------------------------------------------------------------------------------------------------------------------------------------|
| EU-27          |                                                                                                                                                                                             |                                                                                                                                                            |
| Austria        | Supply and use in purchasers' prices until 2007 in euros ( <i>Eurostat</i> ); valuation layers of net taxes and total margins, use in basic prices for year 2006 ( <i>eeSUIOT project</i> ) | Valuation layers (incl confidential information) were provided by Isabelle Rémond-Tiedrez (Eurostat) only for validation                                   |
| Belgium        | Supply and use in purchasers' prices until 2007 in euros ( <i>Eurostat</i> ); valuation layers of net taxes and total margins, use in basic prices for year 2004 ( <i>eeSUIOT project</i> ) | Valuation layers (incl confidential information) were provided by Isabelle Rémond-Tiedrez (Eurostat) only for validation                                   |
| Bulgaria       | Supply and use in purchasers' prices until 2005 in national currency ( <i>Eurostat</i> ); valuation layers of net taxes and total margins for year 2003 ( <i>eeSUIOT project</i> )          | Valuation layers (incl confidential information) were provided by Isabelle Rémond-Tiedrez (Eurostat) only for validation                                   |
| Cyprus         | Supply and use in purchasers' prices until 2007 in euros ( <i>Eurostat</i> )                                                                                                                | For valuation layers, Italian rates are taken as proxy                                                                                                     |
| Czech Republic | Supply and use in purchasers' prices until 2007 in national currency ( <i>Eurostat</i> ); use in basic prices for year 2007 ( <i>eeSUIOT project</i> )                                      | Use in basic prices was provided by Isabelle Rémond-Tiedrez (Eurostat) only for confidential use; for valuation layers rates of Romania are taken as proxy |
| Germany        | Supply and use in purchasers' prices until 2007 in euros ( <i>Eurostat</i> )                                                                                                                | For valuation layers, Austrian rates are taken as proxy                                                                                                    |
| Denmark        | Supply and use in purchasers' prices until 2007 in euros ( <i>Eurostat</i> ); valuation layers of net taxes and total margins, use in basic prices for year 2007 ( <i>eeSUIOT project</i> ) | In use table for 2007 there are negatives in the intermediate part, so for now year 2006 is used                                                           |

**Table S1. Cont.**

| <b>Countries</b> | <b>Available raw data</b>                                                                                                                                                                   | <b>Notes</b>                                                                                                                                                      |
|------------------|---------------------------------------------------------------------------------------------------------------------------------------------------------------------------------------------|-------------------------------------------------------------------------------------------------------------------------------------------------------------------|
| Estonia          | Supply and use in purchasers' prices until 2007 in euros ( <i>Eurostat</i> )                                                                                                                | For valuation layers rates of Romania are taken as proxy                                                                                                          |
| Spain            | Supply and use in purchasers' prices until 2007 in euros ( <i>Eurostat</i> ); use in basic prices for year 2006 ( <i>eeSUIOT project</i> )                                                  | Use in basic prices was provided by Isabelle Rémond-Tiedrez ( <i>Eurostat</i> ) only for confidential use; for valuation layers, Italian rates are taken as proxy |
| Finland          | Supply and use in purchasers' prices until 2007 in euros ( <i>Eurostat</i> ); valuation layers of net taxes and total margins, use in basic prices for year 2006 ( <i>eeSUIOT project</i> ) | Valuation layers (incl confidential information) were provided by Isabelle Rémond-Tiedrez ( <i>Eurostat</i> ) only for validation                                 |
| France           | Supply and use in purchasers' prices until 2007 in euros ( <i>Eurostat</i> )                                                                                                                | For valuation layers, Austrian rates are taken as proxy                                                                                                           |
| Greece           | Supply and use in purchasers' prices until 2007 in euros ( <i>Eurostat</i> )                                                                                                                | For valuation layers rates of Italy are taken as proxy                                                                                                            |
| Hungary          | Supply and use in purchasers' prices until 2007 in euros ( <i>Eurostat</i> )                                                                                                                | For valuation layers, Romanian rates are taken as proxy                                                                                                           |
| Ireland          | Supply and use in purchasers' prices until 2007 in euros ( <i>Eurostat</i> )                                                                                                                | For valuation layers, Danish rates are taken as proxy                                                                                                             |
| Italy            | Supply and use in purchasers' prices until 2007 in euros ( <i>Eurostat</i> ); valuation layers of net taxes and total margins, use in basic prices for year 2007 ( <i>eeSUIOT project</i> ) | Valuation layers (incl confidential information) were provided by Isabelle Rémond-Tiedrez ( <i>Eurostat</i> ) only for validation                                 |
| Lithuania        | Supply and use in purchasers' prices until 2007 in euros ( <i>Eurostat</i> )                                                                                                                | For valuation layers rates of Romania are taken as proxy                                                                                                          |
| Luxembourg       | Supply and use in purchasers' prices until 2007 in euros ( <i>Eurostat</i> )                                                                                                                | For valuation layers, Austrian rates are taken as proxy                                                                                                           |
| Latvia           | Supply and use in purchasers' prices until 2007 in euros ( <i>Eurostat</i> )                                                                                                                | For valuation layers, Romanian rates are taken as proxy                                                                                                           |
| Malta            | Supply and use in purchasers' prices until 2004 in euros ( <i>Eurostat</i> )                                                                                                                | For valuation layers, Romanian rates are taken as proxy                                                                                                           |
| Netherlands      | Supply and use in purchasers' prices until 2007 in euros ( <i>Eurostat</i> ); valuation layers of net taxes and total margins, use in basic prices for year 2007 ( <i>eeSUIOT project</i> ) | Valuation layers (incl confidential information) were provided by Isabelle Rémond-Tiedrez ( <i>Eurostat</i> ) only for validation                                 |
| Poland           | Supply and use in purchasers' prices until 2007 in euros ( <i>Eurostat</i> )                                                                                                                | For valuation layers, Romanian rates are taken as proxy                                                                                                           |
| Portugal         | Supply and use in purchasers' prices until 2006 in euros ( <i>Eurostat</i> )                                                                                                                | For valuation layers, Italian rates are taken as proxy                                                                                                            |

**Table S1. Cont.**

| Countries      | Available raw data                                                                                                                                                                                                                                                     | Notes                                                                                                                                                                                                                                                                                                                                                                                                                                                                 |
|----------------|------------------------------------------------------------------------------------------------------------------------------------------------------------------------------------------------------------------------------------------------------------------------|-----------------------------------------------------------------------------------------------------------------------------------------------------------------------------------------------------------------------------------------------------------------------------------------------------------------------------------------------------------------------------------------------------------------------------------------------------------------------|
| Romania        | Supply and use in purchasers' prices until 2007 in national currency ( <i>Eurostat</i> ); valuation layers of net taxes and total margins for year 2005 ( <i>eeSUIOT project</i> )                                                                                     | Valuation layers (incl confidential information) were provided by Isabelle Rémond-Tiedrez ( <i>Eurostat</i> ) only for validation                                                                                                                                                                                                                                                                                                                                     |
| Sweden         | Supply and use in purchasers' prices until 2007 in euros ( <i>Eurostat</i> )                                                                                                                                                                                           | For valuation layers, Finnish rates are taken as proxy                                                                                                                                                                                                                                                                                                                                                                                                                |
| Slovenia       | Supply and use in purchasers' prices until 2007 in euros ( <i>Eurostat</i> )                                                                                                                                                                                           | For valuation layers, Romanian rates are taken as proxy                                                                                                                                                                                                                                                                                                                                                                                                               |
| Slovakia       | Supply and use in purchasers' prices until 2007 in euros ( <i>Eurostat</i> )                                                                                                                                                                                           | For valuation layers rates of Romania are taken as proxy                                                                                                                                                                                                                                                                                                                                                                                                              |
| United Kingdom | Supply and use in purchasers' prices until 2007 in euros ( <i>Eurostat</i> )                                                                                                                                                                                           | For valuation layers rates of Denmark are taken as proxy                                                                                                                                                                                                                                                                                                                                                                                                              |
| Non EU-27      |                                                                                                                                                                                                                                                                        |                                                                                                                                                                                                                                                                                                                                                                                                                                                                       |
| Australia      | For year 2006–07 in national currency: supply, total use in basic prices, use of imported products in basic prices, valuation layers of taxes and subsidies (4 types), trade margins (2 types), transport margins (6 types) and other margins (4 types) ( <i>ABS</i> ) | In the use table, data was missing (n.p.) for the sector Water, Pipelines and Other Transport and the sector Air and Space Transport in the final demand categories. Also, the concerning rows/columns did not add up to the total. The missing amounts were estimated to achieve balance with total numbers. Use in purchasers' prices and use of domestic products in basic prices were derived from available tables.                                              |
| Brazil         | Supply and use in purchasers' prices for 2007 in national currency; supply, use in purchasers' prices, use of domestic products in basic prices and use of imported products in basic prices for 2005 in national currency ( <i>IBGE</i> )                             | In 2005, table activities “Services to families and associations” and “Domestic services” were aggregated; the split was done to gain consistency with 2007 tables. For 2005, split between margins and net taxes valuation layers was done based on EXIOPOL rates.                                                                                                                                                                                                   |
| Canada         | For 2007 in national currency: supply, use in purchasers' prices, valuation layers of trade margins (2 types), transport margins (4 types), taxes (1 type) and total use in basic prices ( <i>Statistics Canada</i> )                                                  | Many confidential values are forced to zero, therefore could not be differentiated from real zero transactions. According to a contact person in NSI “All column and row totals shown in the tables, however, are accurate”. Use in purchasers' price has non-zero row of subsidies on products and valuation layer of taxes includes only taxes but no subsidies. This implies that the layer of subsidies should be estimated and added to the available use table. |

**Table S1. Cont.**

| Countries   | Available raw data                                                                                                                                                                                                                                                                                                         | Notes                                                                                                                                                                                                                                                                                                                                                               |
|-------------|----------------------------------------------------------------------------------------------------------------------------------------------------------------------------------------------------------------------------------------------------------------------------------------------------------------------------|---------------------------------------------------------------------------------------------------------------------------------------------------------------------------------------------------------------------------------------------------------------------------------------------------------------------------------------------------------------------|
| Switzerland | Supply and use in producers' prices for 2008 in national currency ( <i>ETH Zurich</i> )                                                                                                                                                                                                                                    | Vector of total margins was missing from supply table. Valuation layers of total margins and net taxes were estimated based on EXIOPOL rates. Subsequently, use in purchasers' prices and in basic prices were calculated based on available use and estimated values. Vector of total margins was calculated based on corresponding estimation of valuation layer. |
| Non EU-27   |                                                                                                                                                                                                                                                                                                                            |                                                                                                                                                                                                                                                                                                                                                                     |
| China       | Input-output table in producers' prices for 2007 in national currency ( <i>GTAP</i> ).                                                                                                                                                                                                                                     | See description after the table                                                                                                                                                                                                                                                                                                                                     |
| Indonesia   | For year 2005 in national currency: input-output table in purchasers' prices, total input-output table in producers' prices and domestic input-output table in producers' prices ( <i>BADAN PUSAT STATISTIK</i> )                                                                                                          | See description after the table                                                                                                                                                                                                                                                                                                                                     |
| India       | Use table in factor prices and product mix table for 2004 in national currency ( <i>CENTRAL STATISTICAL ORGANISATION</i> )                                                                                                                                                                                                 | See description after the table                                                                                                                                                                                                                                                                                                                                     |
| Japan       | Input-output table for 2005 in national currencies in the following valuations: total producers' prices, imported products, trade margins (2 types), transport margins (7 types) and purchasers' prices ( <a href="http://www.stat.go.jp/english/index.htm">http://www.stat.go.jp/english/index.htm</a> )                  | See description after the table                                                                                                                                                                                                                                                                                                                                     |
| South Korea | For year 2007's total, domestic and import input-output tables in producers' prices in national currency; for year 2005 input-output table in national currency in the following valuations: basic prices, producers' prices and purchasers' prices ( <i>Bank of Korea</i> )                                               | See description after the table                                                                                                                                                                                                                                                                                                                                     |
| Mexico      | For year 2003 in national currency: supply, use in purchasers' prices, total use in basic prices, use of domestic products in basic prices, use of imported products in basic prices, valuation layers of taxes, subsidies, trade margins and transport margins ( <i>National Institute for Statistics and Geography</i> ) | Data is taken from EXIOPOL raw files. Availability of more recent data was checked, but nothing was available                                                                                                                                                                                                                                                       |
| Norway      | Supply and use in purchasers' prices until 2007 in national currency ( <i>Eurostat</i> ).                                                                                                                                                                                                                                  | For valuation layers, Finnish rates are taken as proxy                                                                                                                                                                                                                                                                                                              |

**Table S1. Cont.**

| Countries     | Available raw data                                                                                                                                                                                                                                                                                                                          | Notes                                                                                                                                                                                                                                                                                                                                                                                                                                                                                                                                                    |
|---------------|---------------------------------------------------------------------------------------------------------------------------------------------------------------------------------------------------------------------------------------------------------------------------------------------------------------------------------------------|----------------------------------------------------------------------------------------------------------------------------------------------------------------------------------------------------------------------------------------------------------------------------------------------------------------------------------------------------------------------------------------------------------------------------------------------------------------------------------------------------------------------------------------------------------|
| Russia        | For year 2003 in national currency: supply, use in purchasers' prices, total use in basic prices, use of domestic products in basic prices, use of imported products in basic prices, valuation layers of net taxes, trade margins and transport margins ( <i>GKS</i> ).                                                                    | Original tables have significant imbalances                                                                                                                                                                                                                                                                                                                                                                                                                                                                                                              |
| Non EU-27     |                                                                                                                                                                                                                                                                                                                                             |                                                                                                                                                                                                                                                                                                                                                                                                                                                                                                                                                          |
| Turkey        | Supply and use in purchasers' prices for 2002 in national currency ( <i>Eurostat</i> )                                                                                                                                                                                                                                                      | For valuation layers, Romanian rates are taken as proxy                                                                                                                                                                                                                                                                                                                                                                                                                                                                                                  |
| Taiwan        | Input-output table for 2006 in national currency in the following valuations: total producers' prices (2 types: with and without import duties), domestic products, imported products (2 types: with and without import duties), trade margins (2 types), transport margins (7 types) and purchasers' prices ( <i>National statistics</i> ) | IO in purchasers' prices taken as use table, and supply was assumed diagonal. Since IO in producers' prices had non-zero row of product taxes, it was assumed that this table can be taken as use in basic prices with exception that VAT and net import duties moved from the value-added block to the row "Net taxes on products" (VA block in basic prices should be the same as in purchasers' prices). Valuation layer of net taxes was calculated as difference between use in purchasers' prices and sum of use in basic prices and total margins |
| United States | For year 2002 in national currency: supply, use in purchasers' prices, total use in basic prices, use of domestic products in basic prices, use of imported products in basic prices, valuation layers of taxes (2 types), subsidies, trade margins (2 types), transport margins (6 types)                                                  | Data is taken from EXIOPOL raw files. Availability of more recent data was checked, but nothing was available                                                                                                                                                                                                                                                                                                                                                                                                                                            |
| South Africa  | Supply and use in purchasers' prices for 2005 in national currency ( <i>Statistics South Africa</i> )                                                                                                                                                                                                                                       | For valuation layers, rates of EXIOPOL are taken as proxy                                                                                                                                                                                                                                                                                                                                                                                                                                                                                                |

### China:

Since only an input-output table was available, it was taken as use table and supply was assumed diagonal. Original data was only available in producers' prices. Therefore, the valuation layer of net taxes had to be estimated based on tax rates available from EXIOPOL. The table of net taxes was then subtracted from the original data; the table in basic prices was the result. However, in some transactions, the tax rates from EXIOPOL were too high (60%–390%). These tax rates were replaced by the tax rate of a comparable transaction. This was the case for most transactions from the products Wholesale and retail trade. Also this was the case for the transactions: transport storage—petroleum processing and transport storage—GFCF. Valuation layer of total margins was estimated based on rates from EXIOPOL. The table of total margins was then added to the original data, and the table in

purchasers' prices was the result. In the original table, the vector of net taxes on products was missing; it was taken as a sum from the net taxes valuation layer. Net taxes on production (from value added block) were adjusted in such a way that all tables were in balance.

### **Indonesia:**

Since only input-output tables are available, supply table was assumed to be diagonal and IO in purchasers' prices were taken as use in purchasers' prices. In IO in purchasers' prices, only taxes (duty and sales) on imported products are given. Taxes on domestic output were estimated using rate on VAT (10%) for most products and zero rate for some specific products. Tax rates were applied only on value added for each product (possible to do since supply is diagonal). Zero tax rate was used for the following products: paddy, beans, maize, "coal and metal ore mining", "crude oil, natural gas and geothermal mining", "other mining and quarrying", "restaurant and hotel", railway, road, water and air transport, financial intermediaries, "general government and defense", "social and community services". Rate of 9% was used for manufactured cigarettes. The rates were based on the Indonesian Tax Guide 2010 from Deloitte. Application of other types of product taxes was very difficult because their rates could vary significantly between specific products within 65 products groups available in IO tables. Vector of total use in purchasers' prices was kept as in original tables and operational surplus in use table was used to keep balance between columns of supply and use tables. Valuation layer of total margins was calculated as IO in purchasers' prices minus IO in producers' prices. Small imbalances were removed using RAS procedure. Valuation layer of net taxes is based on EXIOPOL rates.

### **India:**

In order to get supply table column totals use tables were distributed accordingly with the product mix table. Import vector was already given as part of use table. Factor prices were assumed to be similar to basic prices. Valuation layer of total margins was estimated based on EXIOPOL rates. From available use table net indirect taxes per industry were already known. In order to estimate the net taxes valuation layer, an initial guess was estimated based on EXIOPOL rates and further balanced using minimum entropy taken total taxes from use table as a constraint. For some industries, the mathematical problem could not be solved (because of negatives) and the gross value added was adjusted in such a way that total industry output would remain unchanged. This occurred with the industries: paddy, wheat, gram, sugarcane, groundnut, coconut, tea, tobacco, other crops, milk and milk products, egg and poultry, other livestock products, electricity, railway transport services and communication.

Tax rates, calculated based on EXIOPOL data, were for some transactions extremely high (70%–200%). To compensate for this, either the average of the product category was taken or, when this option would not give an acceptable tax rate, the tax rates of a comparable product category was copied. In the list below the specifications are given:

- Product: Industrial machinery (others)—tax rates were copied from industrial machinery (F and T);
- Product: Other transport equipment—tax rates were copied from motor vehicles;
- Activity: Tea and coffee processing (col)—tax rates were copied from miscellaneous food products;

- Transactions: Industrial machinery (F and T) (row) and tobacco manufacturing—average of product category was taken;
- Activity: Beverages manufacturing (col)—tax rates were copied from miscellaneous food products;
- Transactions: Organic heavy chemicals (row) and computer-related services—tax rates from product category were taken;
- Transactions: Organic heavy chemicals (row) and plastic products—tax rates from product category were taken.

### **Japan:**

In the original data, each transaction is marked by one of the following types: standard input, scrap input, scrap output, by-product input, by-product output, trade margins, transport margins. Original input and output of scrap, as well as by-products, are balanced between each other. The products which had scrap input/output transactions were split into two types: virgin and recycled. Firstly, use table was estimated using following assumptions:

- Intermediate block: standard input + scrap input + scrap output;
- Value added block: standard input;
- Final demand block: standard input + scrap input + scrap output + by-product input (since scrap output should be added with minus sign some of the final demand entries are negative, e.g. used paper, recycled glass product, *etc.*).

In the IO table only commodity taxes and duties on imported product were given. In order to estimate taxes on domestic products, the tax rate of commodity taxes on imported products were used with the following exceptions:

- 5% rate for the products where import rate was not available (5% is an estimate of average commodity tax rate);
- Zero rate on certain products and public services: pork (bone meat), school lunch, private power generation, waste management services, self-transportation by private cars, airport and traffic control, public administration, school education, social education, research institutes, health and hygiene, social insurance, social welfare, office supplies;
- Zero rate on recycled products.

In order to estimate intermediate part of the supply table, total domestic output per product was calculated as total use in purchasers' prices minus total margins minus total product taxes and minus imports. Then scrap output and by-product output were placed in the intermediate part and all the rest domestic output were put on the diagonal.

Since additional taxes on commodities were estimated, operating surplus in use table was used to keep balance between columns of supply and use tables. Valuation layer of net taxes is based on EXIOPOL rates.

### **South Korea:**

Since only an input-output table was available, it was taken as use table and supply was assumed to be diagonal.

The problem with using original IO table for 2007 was that certain products had negatives due positive output of scrapped materials during production process. The table for 2005 had the following properties:

- Purchasers' prices: no negatives, because output of scrapped materials is given in a separate row and total use of scrapped materials is given in a separate column;
- Producers' prices: negatives due positive output of scrapped materials during production process; negatives are only in total and domestic tables, import table was without scrap;
- Basic prices: negatives due positive output of scrapped materials during production process. Value added differs from other valuations. It is likely that this adjustment by the value of net taxes on products was made by the statistical office in order to keep row-column balance (in purchasers' and producers' prices there are only columns with commodity taxes on imported products).

Firstly, valuation layer of total margins for year 2005 and output of scrapped materials by each production activity for year 2005 were estimated using minimum entropy problem. Restrictions used in the estimation:

- Total margins + scrap output = IO in purchasers' prices—IO in producers' prices;
- Each column of margins sums up to zero (positives and negatives are allowed only in specific places);
- Each row of margins sums up to the corresponding value from IO in purchasers' prices;
- Each column of scrap output sums up to the scrap output from IO in purchasers' prices;
- Each row of scrap output sums up to the scrap input from IO in purchasers' prices;

Secondly, IO in producers' prices for year 2005 without negatives was calculated as a difference between IO in purchasers' prices and estimated valuation layer of total margins. Thirdly, scrap output for year 2007 was estimated using the assumption that it equals a certain share of total intermediate inputs. Shares were assumed the same as in year 2005. Scrap output of dummy sector row was set to zero. Next, total scrap was distributed between users. It was assumed that the total amount of a certain scrapped material is used only by one sector. This sector was defined as a maximum user or taken the same as in Japan data. Next, IO in producers' prices for year 2007 without negatives (in intermediate part) was calculated as a sum of original IO in producers' prices and scrap output. All input of scrapped products was put into new product "Recycled materials." Negatives in final consumption reflect output of recycled materials by households and GFCF (this output cannot be put into supply table). Next, valuation layer of total margins for year 2007 was estimated using the margins rates from year 2005. The table was balanced to sum up to zero using the minimum entropy problem approach. Next, IO in purchasers' prices for year 2007 without negatives (in intermediate part) is calculated as a sum of IO in producers' price without negatives and estimated valuation layer of total margins. Next, net taxes on products for year 2007 are estimated using the tax rates from year 2005. For year 2005 net taxes valuation layer is calculated as IO in producers' prices—IO in basic prices. Next, IO in basic prices for year 2007 without negatives (in intermediate part) is calculated as a difference between IO in producers' price without negatives and estimated net taxes. Value added decreased (through taxes on production) by the amount on net taxes on products in order to keep row-column balance. Next, domestic IO in producers' prices for year 2007 is calculated as difference between IO in producers' prices without negatives and original import IO in producers' prices. Supply table was estimated at the



last step with total values on diagonal and all output of scrapped materials put into new product “Recycled materials.” Column of other net taxes on products includes net taxes on domestic products and was calculated as difference between total net taxes from corresponding valuation layer and taxes on imported products (custom duties plus commodity taxes).

#### 1.1.1. Purchasers by Residents Abroad; Purchases on the Domestic Territory by Non-Residents

As we follow the residential principle in the construction of MRIO tables, purchasers abroad must be treated as imports, and purchases on the domestic territory by non-residents are treated as exports. As most countries only report total purchasers abroad and non-resident purchasers, these must be allocated to product type. The allocation is done in a two-step process to estimate a representative import mix of households from the aggregate purchaser prices SUT data:

- (1) proportionally allocating imports vector across different uses to give a crude estimate of imports by households, then
- (2) using this estimate to re-allocate the purchasers abroad.

#### 1.1.2. Electricity—Distribution and Transmission

In order to be able to disaggregate the electricity costs, the data sheets have been filled with information for industry and households, respectively, stemming from work done in EXIOPOL reconciled to Eurostat statistics for the EU (Eurostat 2012b). The data have been made comparable by transforming them into a common unit, *i.e.*, Euros/MWh. Some countries report the relative proportion of distribution and transmission (Australia and Canada) in the SUTs, and these values were confronted with aggregate country specific data where available. Similar treatment was done for distribution of natural gas.

#### 1.1.3. Energy—Price Information

For most carriers/products, the data are directly taken from the IEA source (in \$ per toe) (International Energy Agency 2012b). These data pertain only to selected OECD countries. As for non-OECD countries covered by the IEA, the data are calculated using the original price data (\$ per unit) and suitable conversion factors (toe per unit). For some carriers/products prices per unit of calorific content are not provided by the IEA, so they are calculated even for OECD countries.

For every product, the missing data for a country was calculated using the average product price of other countries from the same geographical region. We distinguish between seven regions:

1. Austria, Belgium, Denmark, France, Germany, Ireland, Italy, Luxembourg, Netherlands, Portugal, Spain, Switzerland, UK
2. Czech Republic, Estonia, Hungary, Latvia, Lithuania, Poland, Slovak Republic
3. Finland, Sweden, Norway
4. Bulgaria, Cyprus, Greece, Malta, Romania, Slovenia, Turkey
5. China, India, Indonesia
6. Korea, Taiwan
7. Brazil, Canada, Mexico, USA.

Prices for Japan were usually too high and evidently independent from other Asian countries, and was therefore not assigned to any region. Because of geographic uncertainty, Australia, Russia and South Africa were also not assigned. For these countries, as well as the RoW, the average price of already-determined prices was taken.

**Table S2.** CREEA country classification.

| <b>Number</b> | <b>Country/Region</b> | <b>Code</b> | <b>EU member</b> |
|---------------|-----------------------|-------------|------------------|
| 1             | Austria               | AT          | EU               |
| 2             | Belgium               | BE          | EU               |
| 3             | Bulgaria              | BG          | EU               |
| 4             | Cyprus                | CY          | EU               |
| 5             | Czech Republic        | CZ          | EU               |
| 6             | Germany               | DE          | EU               |
| 7             | Denmark               | DK          | EU               |
| 8             | Estonia               | EE          | EU               |
| 9             | Spain                 | ES          | EU               |
| 10            | Finland               | FI          | EU               |
| 11            | France                | FR          | EU               |
| 12            | Greece                | GR          | EU               |
| 13            | Hungary               | HU          | EU               |
| 14            | Ireland               | IE          | EU               |
| 15            | Italy                 | IT          | EU               |
| 16            | Lithuania             | LT          | EU               |
| 17            | Luxembourg            | LU          | EU               |
| 18            | Latvia                | LV          | EU               |
| 19            | Malta                 | MT          | EU               |
| 20            | Netherlands           | NL          | EU               |
| 21            | Poland                | PL          | EU               |
| 22            | Portugal              | PT          | EU               |
| 23            | Romania               | RO          | EU               |
| 24            | Sweden                | SE          | EU               |
| 25            | Slovenia              | SI          | EU               |
| 26            | Slovakia              | SK          | EU               |
| 27            | United Kingdom        | GB          | EU               |
| 28            | United States         | US          | nonEU            |
| 29            | Japan                 | JP          | nonEU            |
| 30            | China                 | CN          | nonEU            |
| 31            | Canada                | CA          | nonEU            |
| 32            | South Korea           | KR          | nonEU            |
| 33            | Brazil                | BR          | nonEU            |
| 34            | India                 | IN          | nonEU            |
| 35            | Mexico                | MX          | nonEU            |
| 36            | Russia                | RU          | nonEU            |
| 37            | Australia             | AU          | nonEU            |
| 38            | Switzerland           | CH          | nonEU            |
| 39            | Turkey                | TR          | nonEU            |
| 40            | Taiwan                | TW          | nonEU            |

**Table S2. Cont.**

| <b>Number</b> | <b>Country/Region</b> | <b>Code</b> | <b>EU member</b> |
|---------------|-----------------------|-------------|------------------|
| 41            | Norway                | NO          | nonEU            |
| 42            | Indonesia             | ID          | nonEU            |
| 43            | South Africa          | ZA          | nonEU            |
| 44            | RoW Asia and Pacific  | WA          | nonEU            |
| 45            | RoW America           | WL          | nonEU            |
| 46            | RoW Europe            | WE          | nonEU            |
| 47            | RoW Africa            | WF          | nonEU            |
| 48            | RoW Middle East       | WM          | nonEU            |

**Table S3.** EXIOBASE 2.0 product classification.

| <b>No.</b> | <b>Name</b>                                                                       | <b>Code1</b> | <b>Code2</b> |
|------------|-----------------------------------------------------------------------------------|--------------|--------------|
| 1          | Paddy rice                                                                        | p01.a        | C_PARI       |
| 2          | Wheat                                                                             | p01.b        | C_WHEA       |
| 3          | Cereal grains nec                                                                 | p01.c        | C_OCER       |
| 4          | Vegetables, fruit, nuts                                                           | p01.d        | C_FVEG       |
| 5          | Oil seeds                                                                         | p01.e        | C_OILS       |
| 6          | Sugar cane, sugar beet                                                            | p01.f        | C_SUGB       |
| 7          | Plant-based fibers                                                                | p01.g        | C_FIBR       |
| 8          | Crops nec                                                                         | p01.h        | C_OTCR       |
| 9          | Cattle                                                                            | p01.i        | C_CATL       |
| 10         | Pigs                                                                              | p01.j        | C_PIGS       |
| 11         | Poultry                                                                           | p01.k        | C_PLTR       |
| 12         | Meat animals nec                                                                  | p01.l        | C_OMEA       |
| 13         | Animal products nec                                                               | p01.m        | C_OANP       |
| 14         | Raw milk                                                                          | p01.n        | C_MILK       |
| 15         | Wool, silkworm cocoons                                                            | p01.o        | C_WOOL       |
| 16         | Manure (conventional treatment)                                                   | p01.w.1      | C_MANC       |
| 17         | Manure (biogas treatment)                                                         | p01.w.2      | C_MANB       |
| 18         | Products of forestry, logging and related services (02)                           | p02          | C_FORE       |
| 19         | Fish and other fishing products; services incidental of fishing (05)              | p05          | C_FISH       |
| 20         | Anthracite                                                                        | p10.a        | C_ANTH       |
| 21         | Coking coal                                                                       | p10.b        | C_COKC       |
| 22         | Other bituminous coal                                                             | p10.c        | C_OTBC       |
| 23         | Sub-bituminous coal                                                               | p10.d        | C_SUBC       |
| 24         | Patent fuel                                                                       | p10.e        | C_PATF       |
| 25         | Lignite/Brown coal                                                                | p10.f        | C_LIBC       |
| 26         | BKB/Peat briquettes                                                               | p10.g        | C_BKBP       |
| 27         | Peat                                                                              | p10.h        | C_PEAT       |
| 28         | Crude petroleum and services related to crude oil extraction, excluding surveying | p11.a        | C_COIL       |
| 29         | Natural gas and services related to natural gas extraction, excluding surveying   | p11.b        | C_GASE       |
| 30         | Natural gas liquids                                                               | p11.b.1      | C_GASL       |
| 31         | Other hydrocarbons                                                                | p11.c        | C_OGPL       |

**Table S3. Cont.**

| <b>No.</b> | <b>Name</b>                                                                                          | <b>Code1</b> | <b>Code2</b> |
|------------|------------------------------------------------------------------------------------------------------|--------------|--------------|
| 32         | Uranium and thorium ores (12)                                                                        | p12          | C_ORAN       |
| 33         | Iron ores                                                                                            | p13.1        | C_IRON       |
| 34         | Copper ores and concentrates                                                                         | p13.20.11    | C_COPO       |
| 35         | Nickel ores and concentrates                                                                         | p13.20.12    | C_NIKO       |
| 36         | Aluminum ores and concentrates                                                                       | p13.20.13    | C_ALUO       |
| 37         | Precious metal ores and concentrates                                                                 | p13.20.14    | C_PREO       |
| 38         | Lead, zinc and tin ores and concentrates                                                             | p13.20.15    | C_LZTO       |
| 39         | Other non-ferrous metal ores and concentrates                                                        | p13.20.16    | C_ONFO       |
| 40         | Stone                                                                                                | p14.1        | C_STON       |
| 41         | Sand and clay                                                                                        | p14.2        | C_SDCL       |
| 42         | Chemical and fertilizer minerals, salt and other mining and quarrying products n.e.c.                | p14.3        | C_CHMF       |
| 43         | Products of meat cattle                                                                              | p15.a        | C_PCAT       |
| 44         | Products of meat pigs                                                                                | p15.b        | C_PPIG       |
| 45         | Products of meat poultry                                                                             | p15.c        | C_PPLT       |
| 46         | Meat products nec                                                                                    | p15.d        | C_POME       |
| 47         | Products of Vegetable oils and fats                                                                  | p15.e        | C_VOIL       |
| 48         | Dairy products                                                                                       | p15.f        | C_DAIR       |
| 49         | Processed rice                                                                                       | p15.g        | C_RICE       |
| 50         | Sugar                                                                                                | p15.h        | C_SUGR       |
| 51         | Food products nec                                                                                    | p15.i        | C_OFOD       |
| 52         | Beverages                                                                                            | p15.j        | C_BEVR       |
| 53         | Fish products                                                                                        | p15.k        | C_FSHP       |
| 54         | Tobacco products (16)                                                                                | p16          | C_TOBC       |
| 55         | Textiles (17)                                                                                        | p17          | C_TEXT       |
| 56         | Wearing apparel; furs (18)                                                                           | p18          | C_GARM       |
| 57         | Leather and leather products (19)                                                                    | p19          | C_LETH       |
| 58         | Wood and products of wood and cork (except furniture); articles of straw and plaiting materials (20) | p20          | C_WOOD       |
| 59         | Wood material for treatment, reprocessing of secondary wood material into new wood material          | p20.w        | C_WOOW       |
| 60         | Pulp                                                                                                 | p21.1        | C_PULP       |
| 61         | Secondary paper for treatment, reprocessing of secondary paper into new pulp                         | p21.w.1      | C_PAPR       |
| 62         | Paper and paper products                                                                             | p21.2        | C_PAPE       |
| 63         | Printed matter and recorded media (22)                                                               | p22          | C_MDIA       |
| 64         | Coke oven coke                                                                                       | p23.1.a      | C_COKE       |
| 65         | Gas coke                                                                                             | p23.1.b      | C_GCOK       |
| 66         | Coal tar                                                                                             | p23.1.c      | C_COTA       |
| 67         | Motor gasoline                                                                                       | p23.20.a     | C_MGSL       |
| 68         | Aviation gasoline                                                                                    | p23.20.b     | C_AGSL       |
| 69         | Gasoline-type jet fuel                                                                               | p23.20.c     | C_GJET       |
| 70         | Kerosene-type jet fuel                                                                               | p23.20.d     | C_KJET       |
| 71         | Kerosene                                                                                             | p23.20.e     | C_KERO       |
| 72         | Gas/Diesel oil                                                                                       | p23.20.f     | C_DOIL       |

**Table S3. Cont.**

| <b>No.</b> | <b>Name</b>                                                                                                 | <b>Code1</b> | <b>Code2</b> |
|------------|-------------------------------------------------------------------------------------------------------------|--------------|--------------|
| 73         | Heavy fuel oil                                                                                              | p23.20.g     | C_FOIL       |
| 74         | Refinery gas                                                                                                | p23.20.h     | C_RGAS       |
| 75         | Liquefied petroleum gases (LPG)                                                                             | p23.20.i     | C_LPGA       |
| 76         | Refinery feedstocks                                                                                         | p23.20.j     | C_REFF       |
| 77         | Ethane                                                                                                      | p23.20.k     | C_ETHA       |
| 78         | Naphtha                                                                                                     | p23.20.l     | C_NAPT       |
| 79         | White spirit and SBP                                                                                        | p23.20.m     | C_WHSP       |
| 80         | Lubricants                                                                                                  | p23.20.n     | C_LUBR       |
| 81         | Bitumen                                                                                                     | p23.20.o     | C_BITU       |
| 82         | Paraffin waxes                                                                                              | p23.20.p     | C_PARW       |
| 83         | Petroleum coke                                                                                              | p23.20.q     | C_PETC       |
| 84         | Non-specified petroleum products                                                                            | p23.20.r     | C_NSPP       |
| 85         | Nuclear fuel                                                                                                | p23.3        | C_NUCF       |
| 86         | Plastics, basic                                                                                             | p24.a        | C_PLAS       |
| 87         | Secondary plastic for treatment, reprocessing of secondary plastic into new plastic                         | p24.a.w      | C_PLAW       |
| 88         | N-fertilizer                                                                                                | p24.b        | C_NFER       |
| 89         | P- and other fertilizer                                                                                     | p24.c        | C_PFER       |
| 90         | Chemicals nec                                                                                               | p24.d        | C_CHEM       |
| 91         | Charcoal                                                                                                    | p24.e        | C_CHAR       |
| 92         | Additives/Blending components                                                                               | p24.f        | C_ADDC       |
| 93         | Biogasoline                                                                                                 | p24.g        | C_BIOG       |
| 94         | Biodiesels                                                                                                  | p24.h        | C_BIOD       |
| 95         | Other liquid biofuels                                                                                       | p24.i        | C_OBIO       |
| 96         | Rubber and plastic products (25)                                                                            | p25          | C_RUBP       |
| 97         | Glass and glass products                                                                                    | p26.a        | C_GLAS       |
| 98         | Secondary glass for treatment, reprocessing of secondary glass into new glass                               | p26.w.1      | C_GLAW       |
| 99         | Ceramic goods                                                                                               | p26.b        | C_CRMC       |
| 100        | Bricks, tiles and construction products, in baked clay                                                      | p26.c        | C_BRIK       |
| 101        | Cement, lime and plaster                                                                                    | p26.d        | C_CMNT       |
| 102        | Ash for treatment, reprocessing of ash into clinker                                                         | p26.d.w      | C_ASHW       |
| 103        | Other non-metallic mineral products                                                                         | p26.e        | C_ONMM       |
| 104        | Basic iron and steel and of ferro-alloys and first products thereof                                         | p27.a        | C_STEL       |
| 105        | Secondary steel for treatment, reprocessing of secondary steel into new steel                               | p27.a.w      | C_STEW       |
| 106        | Precious metals                                                                                             | p27.41       | C_PREM       |
| 107        | Secondary precious metals for treatment, reprocessing of secondary precious metals into new precious metals | p27.41.w     | C_PREW       |
| 108        | Aluminum and aluminum products                                                                              | p27.42       | C_ALUM       |
| 109        | Secondary aluminum for treatment, reprocessing of secondary aluminum into new aluminum                      | p27.42.w     | C_ALUW       |
| 110        | Lead, zinc and tin and products thereof                                                                     | p27.43       | C_LZTP       |
| 111        | Secondary lead for treatment, reprocessing of secondary lead into new lead                                  | p27.43.w     | C_LZTW       |

**Table S3. Cont.**

| <b>No.</b> | <b>Name</b>                                                                                                                            | <b>Code1</b> | <b>Code2</b>  |
|------------|----------------------------------------------------------------------------------------------------------------------------------------|--------------|---------------|
| 112        | Copper products                                                                                                                        | p27.44       | C_COPP        |
| 113        | Secondary copper for treatment, reprocessing of secondary copper into new copper                                                       | p27.44.w     | C_COPW        |
| 114        | Other non-ferrous metal products                                                                                                       | p27.45       | C_ONFM        |
| 115        | Secondary other non-ferrous metals for treatment, reprocessing of secondary other non-ferrous metals into new other non-ferrous metals | p27.45.w     | C_ONFW        |
| 116        | Foundry work services                                                                                                                  | p27.5        | C_METC        |
| 117        | Fabricated metal products, except machinery and equipment (28)                                                                         | p28          | C_FABM        |
| 118        | Machinery and equipment n.e.c. (29)                                                                                                    | p29          | C_MACH        |
| 119        | Office machinery and computers (30)                                                                                                    | p30          | C_OFMA        |
| 120        | Electrical machinery and apparatus n.e.c. (31)                                                                                         | p31          | C_ELMA        |
| 121        | Radio, television and communication equipment and apparatus (32)                                                                       | p32          | C_RATV        |
| 122        | Medical, precision and optical instruments, watches and clocks (33)                                                                    | p33          | C_MEIN        |
| 123        | Motor vehicles, trailers and semi-trailers (34)                                                                                        | p34          | C_MOTO        |
| 124        | Other transport equipment (35)                                                                                                         | p35          | C_OTRE        |
| 125        | Furniture; other manufactured goods n.e.c. (36)                                                                                        | p36          | C_FURN        |
| 126        | <i>Secondary raw materials</i>                                                                                                         | <i>p37</i>   | <i>C_RYMS</i> |
| 127        | Bottles for treatment, Recycling of bottles by direct reuse                                                                            | p37.w.1      | C_BOTW        |
| 128        | Electricity by coal                                                                                                                    | p40.11.a     | C_POWC        |
| 129        | Electricity by gas                                                                                                                     | p40.11.b     | C_POWG        |
| 130        | Electricity by nuclear                                                                                                                 | p40.11.c     | C_POWN        |
| 131        | Electricity by hydro                                                                                                                   | p40.11.d     | C_POWH        |
| 132        | Electricity by wind                                                                                                                    | p40.11.e     | C_POWW        |
| 133        | Electricity by petroleum and other oil derivatives                                                                                     | p40.11.f     | C_POWP        |
| 134        | Electricity by biomass and waste                                                                                                       | p40.11.g     | C_POWB        |
| 135        | Electricity by solar photovoltaic                                                                                                      | p40.11.h     | C_POWS        |
| 136        | Electricity by solar thermal                                                                                                           | p40.11.i     | C_POWE        |
| 137        | Electricity by tide, wave, ocean                                                                                                       | p40.11.j     | C_POWO        |
| 138        | Electricity by geothermal                                                                                                              | p40.11.k     | C_POWM        |
| 139        | Electricity nec                                                                                                                        | p40.11.l     | C_POWZ        |
| 140        | Transmission services of electricity                                                                                                   | p40.12       | C_POWT        |
| 141        | Distribution and trade services of electricity                                                                                         | p40.13       | C_POWD        |
| 142        | Coke oven gas                                                                                                                          | p40.2.a      | C_COOG        |
| 143        | Blast furnace gas                                                                                                                      | p40.2.b      | C_MBFG        |
| 144        | Oxygen steel furnace gas                                                                                                               | p40.2.c      | C_MOSG        |
| 145        | Gas works gas                                                                                                                          | p40.2.d      | C_MGWG        |
| 146        | Biogas                                                                                                                                 | p40.2.e      | C_MBIO        |
| 147        | Distribution services of gaseous fuels through mains                                                                                   | p40.2.1      | C_GASD        |
| 148        | Steam and hot water supply services                                                                                                    | p40.3        | C_HWAT        |
| 149        | Collected and purified water, distribution services of water (41)                                                                      | p41          | C_WATR        |
| 150        | Construction work (45)                                                                                                                 | p45          | C_CONS        |

**Table S3. Cont.**

| <b>No.</b> | <b>Name</b>                                                                                                           | <b>Code1</b> | <b>Code2</b> |
|------------|-----------------------------------------------------------------------------------------------------------------------|--------------|--------------|
| 151        | Secondary construction material for treatment, reprocessing of secondary construction material into aggregates        | p45.w        | C_CONW       |
| 152        | Sale, maintenance, repair of motor vehicles, motor vehicles parts, motorcycles, motor cycles parts and accessories    | p50.a        | C_TDMO       |
| 153        | Retail trade services of motor fuel                                                                                   | p50.b        | C_TDFU       |
| 154        | Wholesale trade and commission trade services, except of motor vehicles and motorcycles (51)                          | p51          | C_TDWH       |
| 155        | Retail trade services, except of motor vehicles and motorcycles; repair services of personal and household goods (52) | p52          | C_TDRT       |
| 156        | Hotel and restaurant services (55)                                                                                    | p55          | C_HORE       |
| 157        | Railway transportation services                                                                                       | p60.1        | C_TRAI       |
| 158        | Other land transportation services                                                                                    | p60.2        | C_TLND       |
| 159        | Transportation services via pipelines                                                                                 | p60.3        | C_TPIP       |
| 160        | Sea and coastal water transportation services                                                                         | p61.1        | C_TWAS       |
| 161        | Inland water transportation services                                                                                  | p61.2        | C_TWAI       |
| 162        | Air transport services (62)                                                                                           | p62          | C_TAIR       |
| 163        | Supporting and auxiliary transport services; travel agency services (63)                                              | p63          | C_TAUX       |
| 164        | Post and telecommunication services (64)                                                                              | p64          | C_PTEL       |
| 165        | Financial intermediation services, except insurance and pension funding services (65)                                 | p65          | C_FINT       |
| 166        | Insurance and pension funding services, except compulsory social security services (66)                               | p66          | C_FINS       |
| 167        | Services auxiliary to financial intermediation (67)                                                                   | p67          | C_FAUX       |
| 168        | Real estate services (70)                                                                                             | p70          | C_REAL       |
| 169        | Renting services of machinery and equipment without operator and of personal and household goods (71)                 | p71          | C_MARE       |
| 170        | Computer and related services (72)                                                                                    | p72          | C_COMP       |
| 171        | Research and development services (73)                                                                                | p73          | C_RESD       |
| 172        | Other business services (74)                                                                                          | p74          | C_OBUS       |
| 173        | Public administration and defense services; compulsory social security services (75)                                  | p75          | C_PADF       |
| 174        | Education services (80)                                                                                               | p80          | C_EDUC       |
| 175        | Health and social work services (85)                                                                                  | p85          | C_HEAL       |
| 176        | Food waste for treatment: incineration                                                                                | p90.1.a      | C_INCF       |
| 177        | Paper waste for treatment: incineration                                                                               | p90.1.b      | C_INCP       |
| 178        | Plastic waste for treatment: incineration                                                                             | p90.1.c      | C_INCL       |
| 179        | Inert/metal waste for treatment: incineration                                                                         | p90.1.d      | C_INCM       |
| 180        | Textiles waste for treatment: incineration                                                                            | p90.1.e      | C_INCT       |
| 181        | Wood waste for treatment: incineration                                                                                | p90.1.f      | C_INCW       |
| 182        | Oil/hazardous waste for treatment: incineration                                                                       | p90.1.g      | C_INCO       |
| 183        | Food waste for treatment: biogasification and land application                                                        | p90.2.a      | C_BIOF       |
| 184        | Paper waste for treatment: biogasification and land application                                                       | p90.2.b      | C_BIOP       |
| 185        | Sewage sludge for treatment: biogasification and land application                                                     | p90.2.c      | C_BIOS       |
| 186        | Food waste for treatment: composting and land application                                                             | p90.3.a      | C_COMF       |

**Table S3. Cont.**

| No. | Name                                                                | Code1          | Code2         |
|-----|---------------------------------------------------------------------|----------------|---------------|
| 187 | Paper and wood waste for treatment: composting and land application | <i>p90.3.b</i> | <i>C_COMW</i> |
| 188 | Food waste for treatment: waste water treatment                     | <i>p90.4.a</i> | <i>C_WASF</i> |
| 189 | Other waste for treatment: waste water treatment                    | <i>p90.4.b</i> | <i>C_WASO</i> |
| 190 | Food waste for treatment: landfill                                  | <i>p90.5.a</i> | <i>C_LANF</i> |
| 191 | Paper for treatment: landfill                                       | <i>p90.5.b</i> | <i>C_LANP</i> |
| 192 | Plastic waste for treatment: landfill                               | <i>p90.5.c</i> | <i>C_LANL</i> |
| 193 | Inert/metal/hazardous waste for treatment: landfill                 | <i>p90.5.d</i> | <i>C_LANI</i> |
| 194 | Textiles waste for treatment: landfill                              | <i>p90.5.e</i> | <i>C_LANT</i> |
| 195 | Wood waste for treatment: landfill                                  | <i>p90.5.f</i> | <i>C_LANW</i> |
| 196 | Membership organization services n.e.c. (91)                        | <i>p91</i>     | <i>C_ORGA</i> |
| 197 | Recreational, cultural and sporting services (92)                   | <i>p92</i>     | <i>C_RECR</i> |
| 198 | Other services (93)                                                 | <i>p93</i>     | <i>C_OSER</i> |
| 199 | Private households with employed persons (95)                       | <i>p95</i>     | <i>C_PRHH</i> |
| 200 | Extraterritorial organizations and bodies                           | <i>p99</i>     | <i>C_EXTO</i> |

**Table S4. EXIOBASE 2.0 industry classification.**

| No. | EXIOBASE 2.0 Industry sectors                                                                       | Code1          | Code2         |
|-----|-----------------------------------------------------------------------------------------------------|----------------|---------------|
| 1   | Cultivation of paddy rice                                                                           | <i>i01.a</i>   | <i>A_PARI</i> |
| 2   | Cultivation of wheat                                                                                | <i>i01.b</i>   | <i>A_WHEA</i> |
| 3   | Cultivation of cereal grains nec                                                                    | <i>i01.c</i>   | <i>A_OCER</i> |
| 4   | Cultivation of vegetables, fruit, nuts                                                              | <i>i01.d</i>   | <i>A_FVEG</i> |
| 5   | Cultivation of oil seeds                                                                            | <i>i01.e</i>   | <i>A_OILS</i> |
| 6   | Cultivation of sugar cane, sugar beet                                                               | <i>i01.f</i>   | <i>A_SUGB</i> |
| 7   | Cultivation of plant-based fibers                                                                   | <i>i01.g</i>   | <i>A_FIBR</i> |
| 8   | Cultivation of crops nec                                                                            | <i>i01.h</i>   | <i>A_OTCR</i> |
| 9   | Cattle farming                                                                                      | <i>i01.i</i>   | <i>A_CATL</i> |
| 10  | Pig farming                                                                                         | <i>i01.j</i>   | <i>A_PIGS</i> |
| 11  | Poultry farming                                                                                     | <i>i01.k</i>   | <i>A_PLTR</i> |
| 12  | Meat animals nec                                                                                    | <i>i01.l</i>   | <i>A_OMEA</i> |
| 13  | Animal products nec                                                                                 | <i>i01.m</i>   | <i>A_OANP</i> |
| 14  | Raw milk                                                                                            | <i>i01.n</i>   | <i>A_MILK</i> |
| 15  | Wool, silkworm cocoons                                                                              | <i>i01.o</i>   | <i>A_WOOL</i> |
| 16  | Manure treatment (conventional), storage and land application                                       | <i>i01.w.1</i> | <i>A_MANC</i> |
| 17  | Manure treatment (biogas), storage and land application                                             | <i>i01.w.2</i> | <i>A_MANB</i> |
| 18  | Forestry, logging and related service activities (02)                                               | <i>i02</i>     | <i>A_FORE</i> |
| 19  | Fishing, operating of fish hatcheries and fish farms; service activities incidental to fishing (05) | <i>i05</i>     | <i>A_FISH</i> |
| 20  | Mining of coal and lignite; extraction of peat (10)                                                 | <i>i10</i>     | <i>A_COAL</i> |
| 21  | Extraction of crude petroleum and services related to crude oil extraction, excluding surveying     | <i>i11.a</i>   | <i>A_COIL</i> |
| 22  | Extraction of natural gas and services related to natural gas extraction, excluding surveying       | <i>i11.b</i>   | <i>A_GASE</i> |
| 23  | Extraction, liquefaction, and regasification of other petroleum and gaseous materials               | <i>i11.c</i>   | <i>A_OGPL</i> |



**Table S4. Cont.**

| <b>No.</b> | <b>EXIOBASE 2.0 Industry sectors</b>                                                                                                 | <b>Code1</b> | <b>Code2</b> |
|------------|--------------------------------------------------------------------------------------------------------------------------------------|--------------|--------------|
| 24         | Mining of uranium and thorium ores (12)                                                                                              | i12          | A_ORAN       |
| 25         | Mining of iron ores                                                                                                                  | i13.1        | A_IRON       |
| 26         | Mining of copper ores and concentrates                                                                                               | i13.20.11    | A_COPO       |
| 27         | Mining of nickel ores and concentrates                                                                                               | i13.20.12    | A_NIKO       |
| 28         | Mining of aluminum ores and concentrates                                                                                             | i13.20.13    | A_ALUO       |
| 29         | Mining of precious metal ores and concentrates                                                                                       | i13.20.14    | A_PREO       |
| 30         | Mining of lead, zinc and tin ores and concentrates                                                                                   | i13.20.15    | A_LZTO       |
| 31         | Mining of other non-ferrous metal ores and concentrates                                                                              | i13.20.16    | A_ONFO       |
| 32         | Quarrying of stone                                                                                                                   | i14.1        | A_STON       |
| 33         | Quarrying of sand and clay                                                                                                           | i14.2        | A_SDCL       |
| 34         | Mining of chemical and fertilizer minerals, production of salt, other mining and quarrying n.e.c.                                    | i14.3        | A_CHMF       |
| 35         | Processing of meat cattle                                                                                                            | i15.a        | A_PCAT       |
| 36         | Processing of meat pigs                                                                                                              | i15.b        | A_PPIG       |
| 37         | Processing of meat poultry                                                                                                           | i15.c        | A_PPLT       |
| 38         | Production of meat products nec                                                                                                      | i15.d        | A_POME       |
| 39         | Processing vegetable oils and fats                                                                                                   | i15.e        | A_VOIL       |
| 40         | Processing of dairy products                                                                                                         | i15.f        | A_DAIR       |
| 41         | Processed rice                                                                                                                       | i15.g        | A_RICE       |
| 42         | Sugar refining                                                                                                                       | i15.h        | A_SUGR       |
| 43         | Processing of food products nec                                                                                                      | i15.i        | A_OFOD       |
| 44         | Manufacture of beverages                                                                                                             | i15.j        | A_BEVR       |
| 45         | Manufacture of fish products                                                                                                         | i15.k        | A_FSHP       |
| 46         | Manufacture of tobacco products (16)                                                                                                 | i16          | A_TOBC       |
| 47         | Manufacture of textiles (17)                                                                                                         | i17          | A_TEXT       |
| 48         | Manufacture of wearing apparel; dressing and dyeing of fur (18)                                                                      | i18          | A_GARM       |
| 49         | Tanning and dressing of leather; manufacture of luggage, handbags, saddlery, harness and footwear (19)                               | i19          | A_LETH       |
| 50         | Manufacture of wood and of products of wood and cork, except furniture; manufacture of articles of straw and plaiting materials (20) | i20          | A_WOOD       |
| 51         | Reprocessing of secondary wood material into new wood material                                                                       | i20.w        | A_WOOW       |
| 52         | Pulp                                                                                                                                 | i21.1        | A_PULP       |
| 53         | Reprocessing of secondary paper into new pulp                                                                                        | i21.w.1      | A_PAPR       |
| 54         | Paper                                                                                                                                | i21.2        | A_PAPE       |
| 55         | Publishing, printing and reproduction of recorded media (22)                                                                         | i22          | A_MDIA       |
| 56         | Manufacture of coke oven products                                                                                                    | i23.1        | A_COKE       |
| 57         | Petroleum refinery                                                                                                                   | i23.2        | A_REFN       |
| 58         | Processing of nuclear fuel                                                                                                           | i23.3        | A_NUCF       |
| 59         | Plastics, basic                                                                                                                      | i24.1        | A_PLAS       |
| 60         | Reprocessing of secondary plastic into new plastic                                                                                   | i24.1.w      | A_PLAW       |
| 61         | N-fertilizer                                                                                                                         | i24.2        | A_NFER       |
| 62         | P- and other fertilizer                                                                                                              | i24.3        | A_PFER       |
| 63         | Chemicals nec                                                                                                                        | i24.4        | A_CHEM       |
| 64         | Manufacture of rubber and plastic products (25)                                                                                      | i25          | A_RUBP       |

**Table S4. Cont.**

| <b>No.</b> | <b>EXIOBASE 2.0 Industry sectors</b>                                                 | <b>Code1</b> | <b>Code2</b>  |
|------------|--------------------------------------------------------------------------------------|--------------|---------------|
| 65         | Manufacture of glass and glass products                                              | i26.a        | A_GLAS        |
| 66         | Reprocessing of secondary glass into new glass                                       | i26.w.1      | A_GLAW        |
| 67         | Manufacture of ceramic goods                                                         | i26.b        | A_CRMC        |
| 68         | Manufacture of bricks, tiles and construction products, in baked clay                | i26.c        | A_BRIK        |
| 69         | Manufacture of cement, lime and plaster                                              | i26.d        | A_CMNT        |
| 70         | Reprocessing of ash into clinker                                                     | i26.d.w      | A_ASHW        |
| 71         | Manufacture of other non-metallic mineral products n.e.c.                            | i26.e        | A_ONMM        |
| 72         | Manufacture of basic iron and steel and of ferro-alloys and first products thereof   | i27.a        | A_STEL        |
| 73         | Reprocessing of secondary steel into new steel                                       | i27.a.w      | A_STEW        |
| 74         | Precious metals production                                                           | i27.41       | A_PREM        |
| 75         | Reprocessing of secondary precious metals into new precious metals                   | i27.41.w     | A_PREW        |
| 76         | Aluminum production                                                                  | i27.42       | A_ALUM        |
| 77         | Reprocessing of secondary aluminum into new aluminum                                 | i27.42.w     | A_ALUW        |
| 78         | Lead, zinc and tin production                                                        | i27.43       | A_LZTP        |
| 79         | Reprocessing of secondary lead into new lead                                         | i27.43.w     | A_LZTW        |
| 80         | Copper production                                                                    | i27.44       | A_COPP        |
| 81         | Reprocessing of secondary copper into new copper                                     | i27.44.w     | A_COPW        |
| 82         | Other non-ferrous metal production                                                   | i27.45       | A_ONFM        |
| 83         | Reprocessing of secondary other non-ferrous metals into new other non-ferrous metals | i27.45.w     | A_ONFW        |
| 84         | Casting of metals                                                                    | i27.5        | A_METC        |
| 85         | Manufacture of fabricated metal products, except machinery and equipment (28)        | i28          | A_FABM        |
| 86         | Manufacture of machinery and equipment n.e.c. (29)                                   | i29          | A_MACH        |
| 87         | Manufacture of office machinery and computers (30)                                   | i30          | A_OFMA        |
| 88         | Manufacture of electrical machinery and apparatus n.e.c. (31)                        | i31          | A_ELMA        |
| 89         | Manufacture of radio, television and communication equipment and apparatus (32)      | i32          | A_RATV        |
| 90         | Manufacture of medical, precision and optical instruments, watches and clocks (33)   | i33          | A_MEIN        |
| 91         | Manufacture of motor vehicles, trailers and semi-trailers (34)                       | i34          | A_MOTO        |
| 92         | Manufacture of other transport equipment (35)                                        | i35          | A_OTRE        |
| 93         | Manufacture of furniture; manufacturing n.e.c. (36)                                  | i36          | A_FURN        |
| 94         | <i>Recycling of waste and scrap</i>                                                  | <i>i37</i>   | <i>A_RYMS</i> |
| 95         | Recycling of bottles by direct reuse                                                 | i37.w.1      | A_BOTW        |
| 96         | Production of electricity by coal                                                    | i40.11.a     | A_POWC        |
| 97         | Production of electricity by gas                                                     | i40.11.b     | A_POWG        |
| 98         | Production of electricity by nuclear                                                 | i40.11.c     | A_POWN        |
| 99         | Production of electricity by hydro                                                   | i40.11.d     | A_POWH        |
| 100        | Production of electricity by wind                                                    | i40.11.e     | A_POWW        |
| 101        | Production of electricity by petroleum and other oil derivatives                     | i40.11.f     | A_POWP        |
| 102        | Production of electricity by biomass and waste                                       | i40.11.g     | A_POWB        |

**Table S4. Cont.**

| <b>No.</b> | <b>EXIOBASE 2.0 Industry sectors</b>                                                                               | <b>Code1</b> | <b>Code2</b> |
|------------|--------------------------------------------------------------------------------------------------------------------|--------------|--------------|
| 103        | Production of electricity by solar photovoltaic                                                                    | i40.11.h     | A_POWS       |
| 104        | Production of electricity by solar thermal                                                                         | i40.11.i     | A_POWE       |
| 105        | Production of electricity by tide, wave, ocean                                                                     | i40.11.j     | A_POWO       |
| 106        | Production of electricity by geothermal                                                                            | i40.11.k     | A_POWM       |
| 107        | Production of electricity nec                                                                                      | i40.11.l     | A_POWZ       |
| 108        | Transmission of electricity                                                                                        | i40.12       | A_POWT       |
| 109        | Distribution and trade of electricity                                                                              | i40.13       | A_POWD       |
| 110        | Manufacture of gas; distribution of gaseous fuels through mains                                                    | i40.2        | A_GASD       |
| 111        | Steam and hot water supply                                                                                         | i40.3        | A_HWAT       |
| 112        | Collection, purification and distribution of water (41)                                                            | i41          | A_WATR       |
| 113        | Construction (45)                                                                                                  | i45          | A_CONS       |
| 114        | Reprocessing of secondary construction material into aggregates                                                    | i45.w        | A_CONW       |
| 115        | Sale, maintenance, repair of motor vehicles, motor vehicles parts, motorcycles, motor cycles parts and accessories | i50.a        | A_TDMO       |
| 116        | Retail sale of automotive fuel                                                                                     | i50.b        | A_TDFU       |
| 117        | Wholesale trade and commission trade, except of motor vehicles and motorcycles (51)                                | i51          | A_TDWH       |
| 118        | Retail trade, except of motor vehicles and motorcycles; repair of personal and household goods (52)                | i52          | A_TDRT       |
| 119        | Hotels and restaurants (55)                                                                                        | i55          | A_HORE       |
| 120        | Transport via railways                                                                                             | i60.1        | A_TRAI       |
| 121        | Other land transport                                                                                               | i60.2        | A_TLND       |
| 122        | Transport via pipelines                                                                                            | i60.3        | A_TPIP       |
| 123        | Sea and coastal water transport                                                                                    | i61.1        | A_TWAS       |
| 124        | Inland water transport                                                                                             | i61.2        | A_TWAI       |
| 124        | Air transport (62)                                                                                                 | i62          | A_TAIR       |
| 126        | Supporting and auxiliary transport activities; activities of travel agencies (63)                                  | i63          | A_TAUX       |
| 127        | Post and telecommunications (64)                                                                                   | i64          | A_PTEL       |
| 128        | Financial intermediation, except insurance and pension funding (65)                                                | i65          | A_FINT       |
| 129        | Insurance and pension funding, except compulsory social security (66)                                              | i66          | A_FINS       |
| 130        | Activities auxiliary to financial intermediation (67)                                                              | i67          | A_FAUX       |
| 131        | Real estate activities (70)                                                                                        | i70          | A_REAL       |
| 132        | Renting of machinery and equipment without operator and of personal and household goods (71)                       | i71          | A_MARE       |
| 133        | Computer and related activities (72)                                                                               | i72          | A_COMP       |
| 134        | Research and development (73)                                                                                      | i73          | A_RESD       |
| 135        | Other business activities (74)                                                                                     | i74          | A_OBUS       |
| 136        | Public administration and defense; compulsory social security (75)                                                 | i75          | A_PADF       |
| 137        | Education (80)                                                                                                     | i80          | A_EDUC       |
| 138        | Health and social work (85)                                                                                        | i85          | A_HEAL       |
| 139        | Incineration of waste: food                                                                                        | i90.1.a      | A_INCF       |
| 140        | Incineration of waste: paper                                                                                       | i90.1.b      | A_INCP       |
| 141        | Incineration of waste: plastic                                                                                     | i90.1.c      | A_INCL       |

**Table S4. Cont.**

| <b>No.</b> | <b>EXIOBASE 2.0 Industry sectors</b>                     | <b>Code1</b>   | <b>Code2</b>  |
|------------|----------------------------------------------------------|----------------|---------------|
| 142        | Incineration of waste: metals and inert materials        | <i>i90.1.d</i> | <i>A_INCM</i> |
| 143        | Incineration of waste: textiles                          | <i>i90.1.e</i> | <i>A_INCT</i> |
| 144        | Incineration of waste: wood                              | <i>i90.1.f</i> | <i>A_INCW</i> |
| 145        | Incineration of waste: oil/hazardous waste               | <i>i90.1.g</i> | <i>A_INCO</i> |
| 146        | Biogasification of food waste, incl. land application    | <i>i90.3.a</i> | <i>A_BIOF</i> |
| 147        | Biogasification of paper, incl. land application         | <i>i90.3.b</i> | <i>A_BIOP</i> |
| 148        | Biogasification of sewage sludge, incl. land application | <i>i90.3.c</i> | <i>A_BIOS</i> |
| 149        | Composting of food waste, incl. land application         | <i>i90.4.a</i> | <i>A_COMF</i> |
| 150        | Composting of paper and wood, incl. land application     | <i>i90.4.b</i> | <i>A_COMW</i> |
| 151        | Waste water treatment, food                              | <i>i90.5.a</i> | <i>A_WASF</i> |
| 152        | Waste water treatment, other                             | <i>i90.5.b</i> | <i>A_WASO</i> |
| 153        | Landfill of waste: food                                  | <i>i90.6.a</i> | <i>A_LANF</i> |
| 154        | Landfill of waste: paper                                 | <i>i90.6.b</i> | <i>A_LANP</i> |
| 155        | Landfill of waste: plastic                               | <i>i90.6.c</i> | <i>A_LANL</i> |
| 156        | Landfill of waste: inert/metal/hazardous                 | <i>i90.6.d</i> | <i>A_LANI</i> |
| 157        | Landfill of waste: textiles                              | <i>i90.6.e</i> | <i>A_LANT</i> |
| 158        | Landfill of waste: wood                                  | <i>i90.6.f</i> | <i>A_LANW</i> |
| 159        | Activities of membership organization n.e.c. (91)        | <i>i91</i>     | <i>A_ORGA</i> |
| 160        | Recreational, cultural and sporting activities (92)      | <i>i92</i>     | <i>A_RECR</i> |
| 161        | Other service activities (93)                            | <i>i93</i>     | <i>A_OSER</i> |
| 162        | Private households with employed persons (95)            | <i>i95</i>     | <i>A_PRHH</i> |
| 163        | Extraterritorial organizations and bodies                | <i>i99</i>     | <i>A_EXTO</i> |
